# Supplementary material for: GRB2 dimerization mediated by SH2 domain-swapping is critical for T cell signaling and cytokine production
Source: PubMed Central journal article supplement (PMC9981690; doi:10.1038/s41598-023-30562-7), 2023-03-02
Supplement: 41598_2023_30562_MOESM1_ESM.pdf [file 41598_2023_30562_MOESM1_ESM.pdf]

## **Figure Legends**

**Supplemental Figure 1.** SDS-PAGE analysis following capture by IMAC of full-length, His-tagged GRB2 A) WT, B) N188D/N214D, C) V123D, and D) V122P/V123P. Loading order was as follows: bulk lysate (lane 1); post-capture flow-through (lane 2); eluate (lanes 3-5 and 7-10 or 11); molecular weight ladder (lane 6). Red starts denote target protein in lysate, absent thereafter in flow-through. Analyses representative of at least 3 independent experiments.

**Supplemental Figure 2.** SDS PAGE analysis of fractions spanning chromatographic peaks are shown for A) GRB2 WT, B) N188D/N214D, C) V123D putative monomer, and D) V122P/V123P putative dimer.

**Supplemental Figure 3.** SEC-MALS elutions of GRB2 dimers in full, with light scattering and refractive index plotted against elution time for A) WT dimer, B) N188D/N214D dimer, and C) V122P/V123P dimer. Dashed lines denote the molecular weights of GRB2 monomer (~28 kDa) and dimer (~56 kDa).

**Supplemental Figure 4.** Guinier analyses of the low-q regions, along with  $R^2$  are shown for GRB2 A) WT monomer, B) WT dimer, C) N188D/N214D monomer, D) N188D/N214D dimer, E) V123D putative monomer, and F) V122P/V123P putative dimer.

**Supplemental Figure 5.** Western immunoblot of whole-cell lysates (WCL) of transfected HuT78 T cells probing for GRB2 and GAPDH (control). Loading order was as follows: molecular weight ladder (lane 1); WCL of GRB2 knockdown (lane 2); WCL of GRB2 WT addback (lane 3); WCL of GRB2 V123D addback (lane 4); WCL of GRB2 V123N addback (lane 5); and WCL of GRB2 V122P/V123P addback (lane 6). Note: GRB2 V123N mutant was not used in these studies.

**Supplemental Figure 6.** Western immunoblot of whole-cell lysates (WCL) of transfected HuT78 T cells probing for phospho-LAT (pY226) and GAPDH (control).

**Supplementary Table 1.** Mammalian GRB2 structures available in the PDB.

**Supplemental Table 2.** SEC-MALS-SAXS experimental parameters.

# Supplemental Figure 1

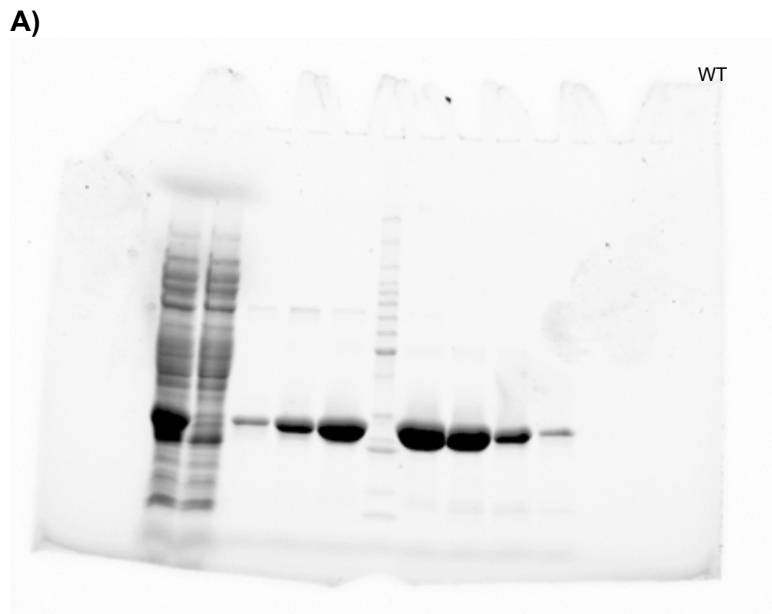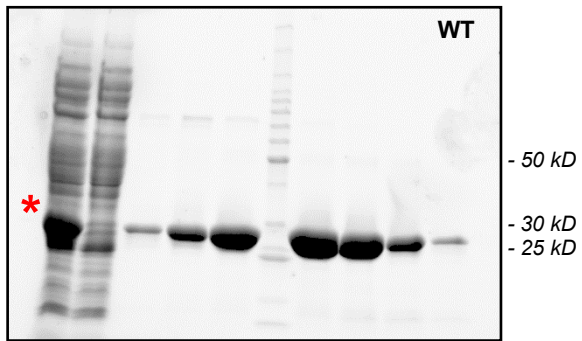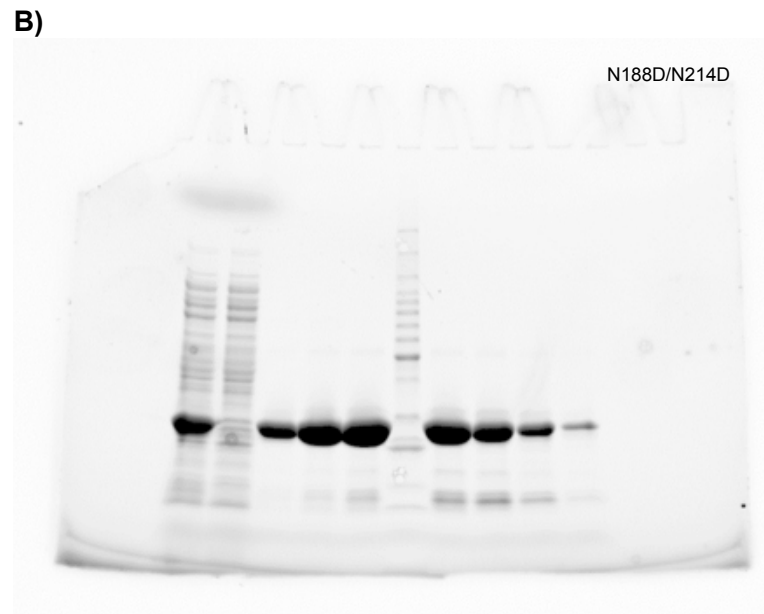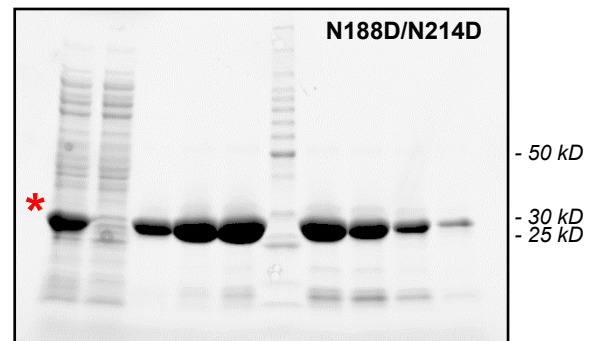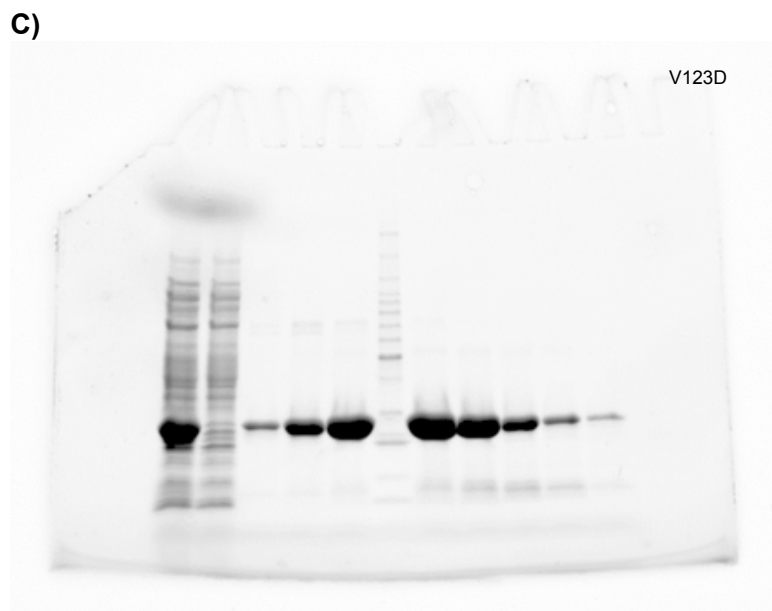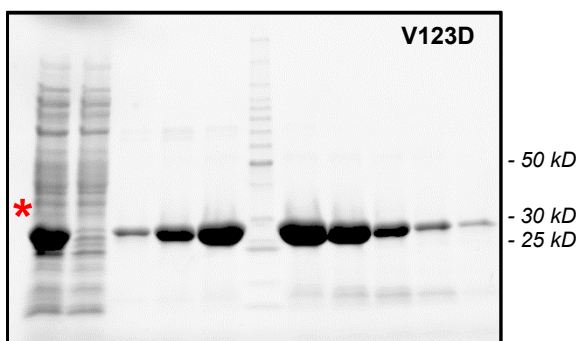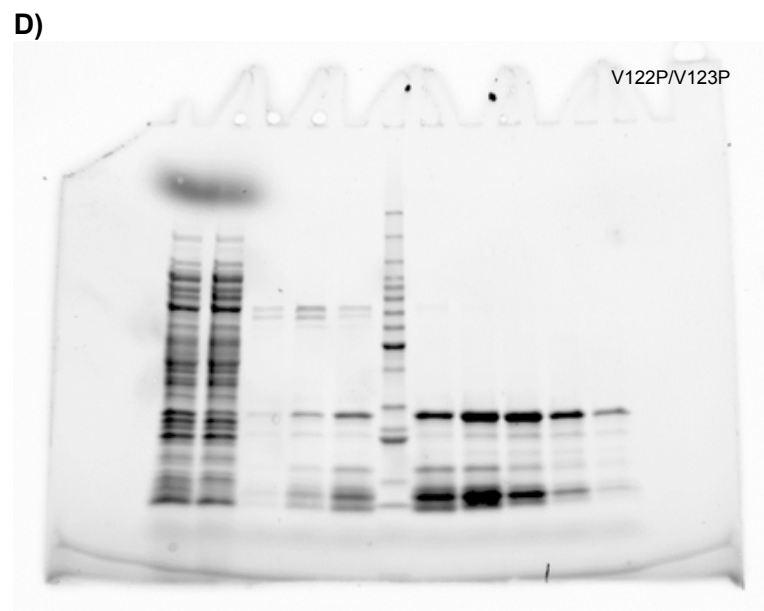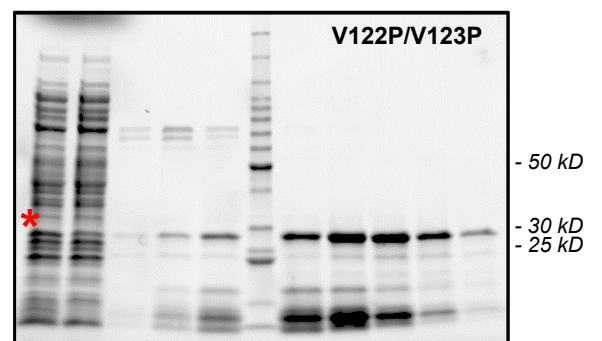

# Supplemental Figure 2

A)

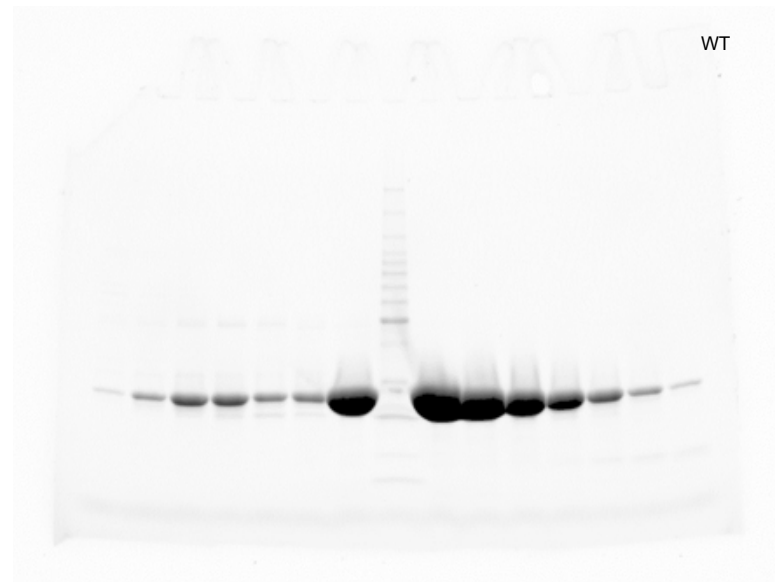

B)

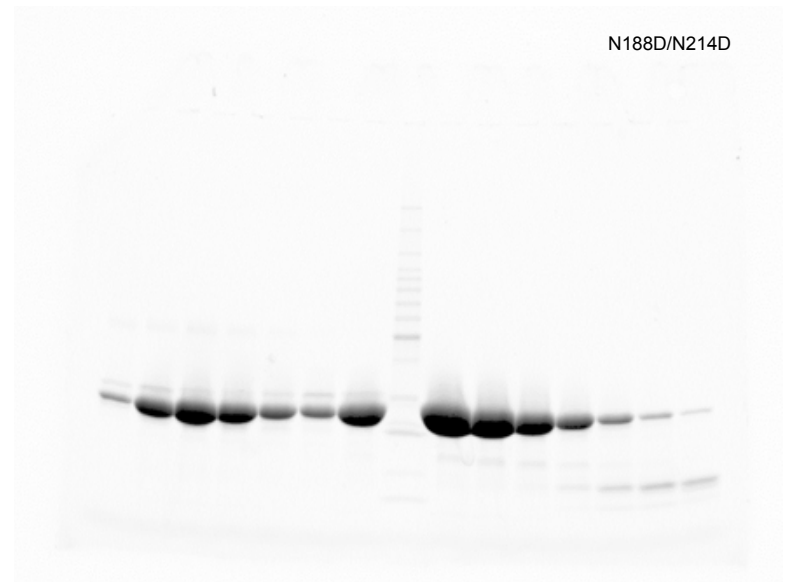

C)

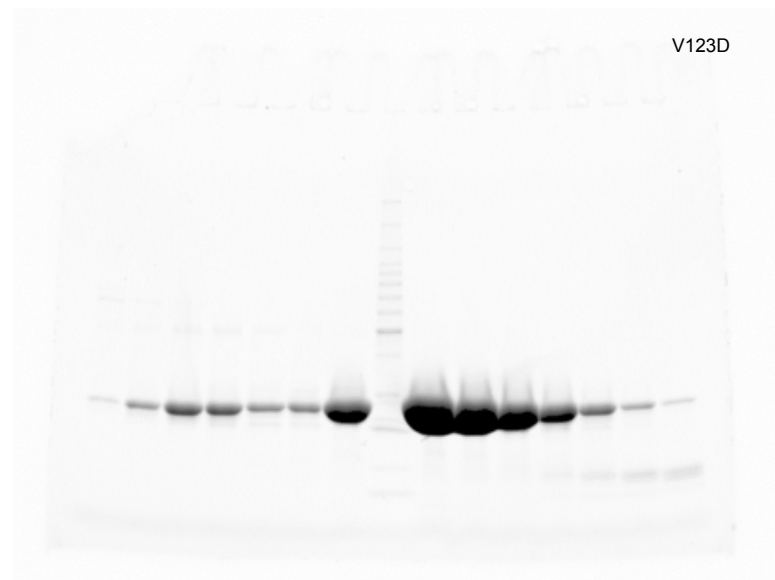

D)

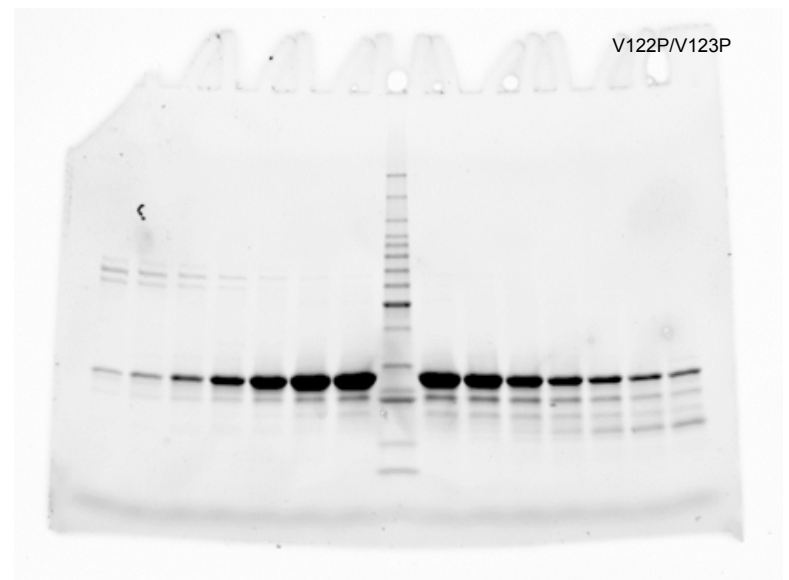

# Supplemental Figure 3

A)

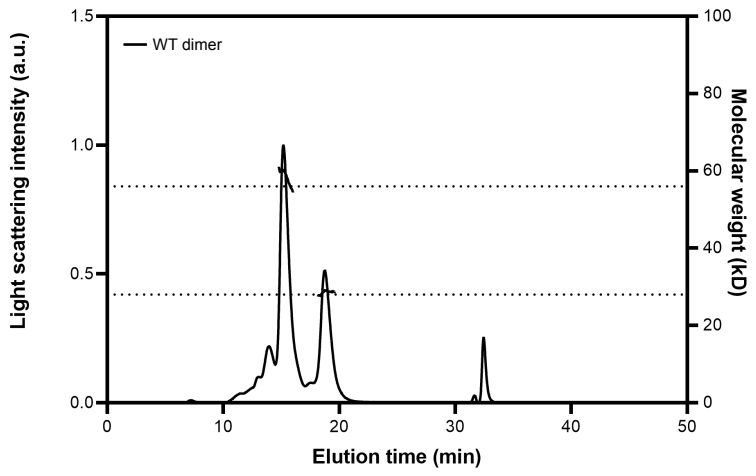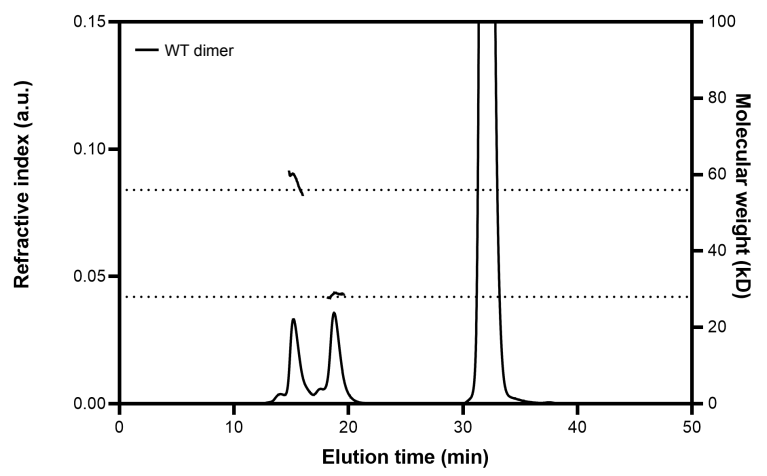

B)

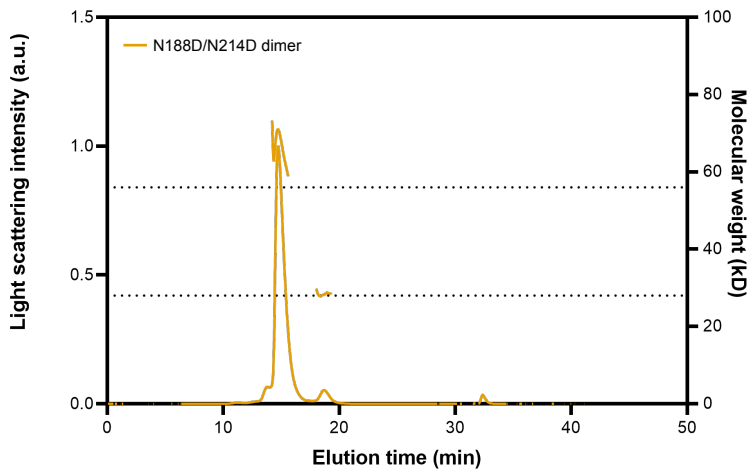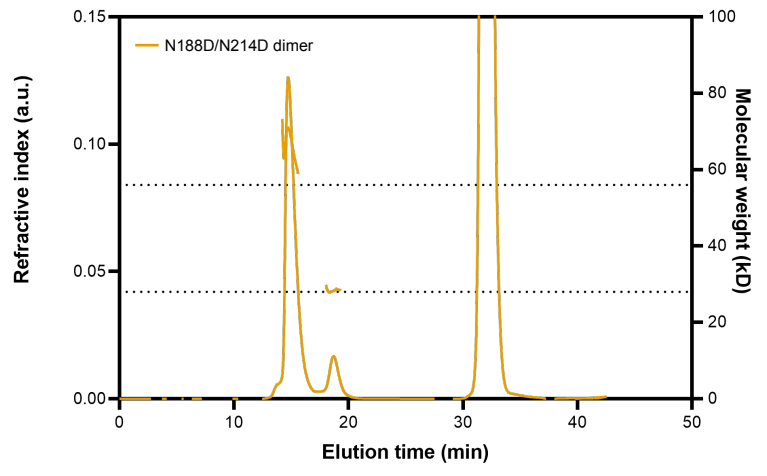

C)

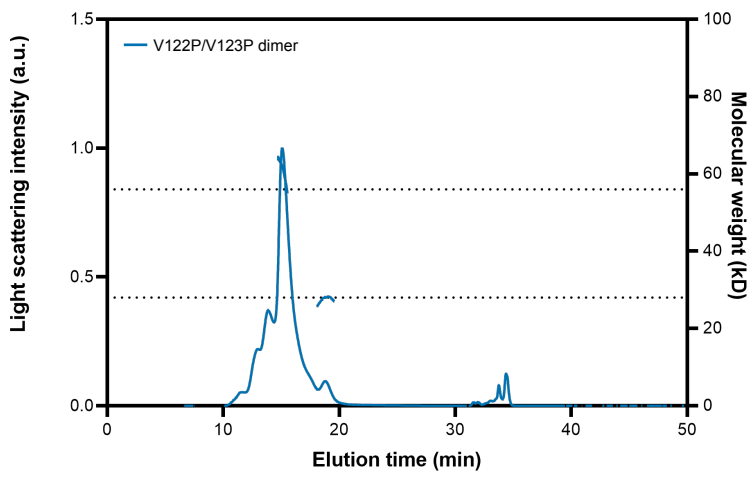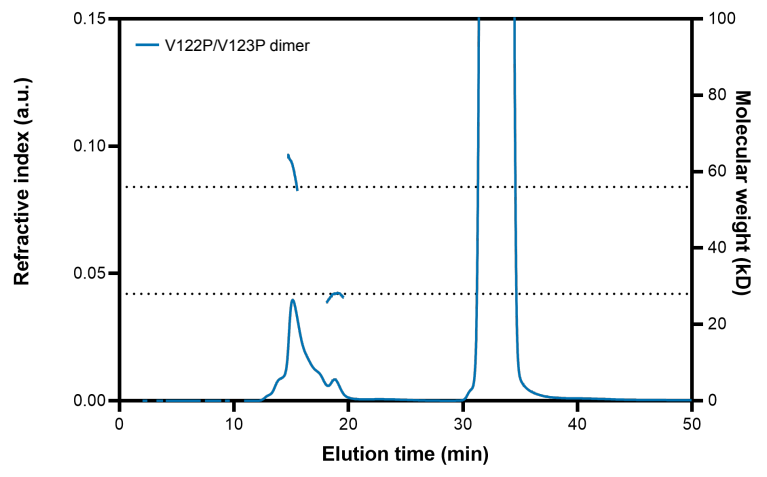

# Supplemental Figure 4

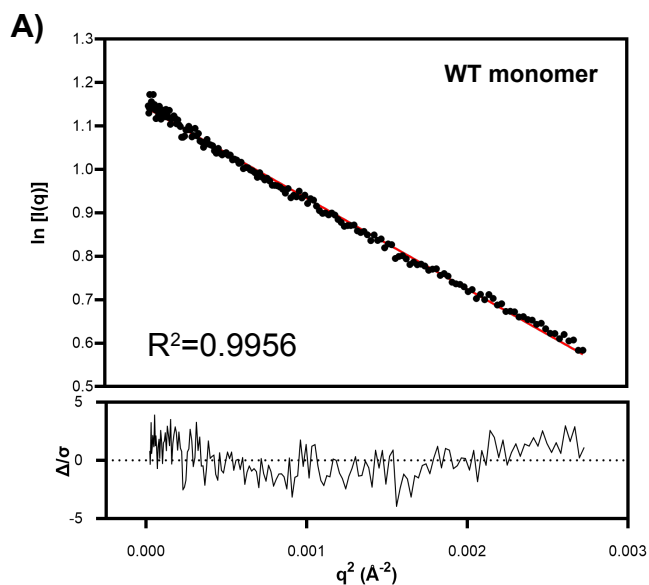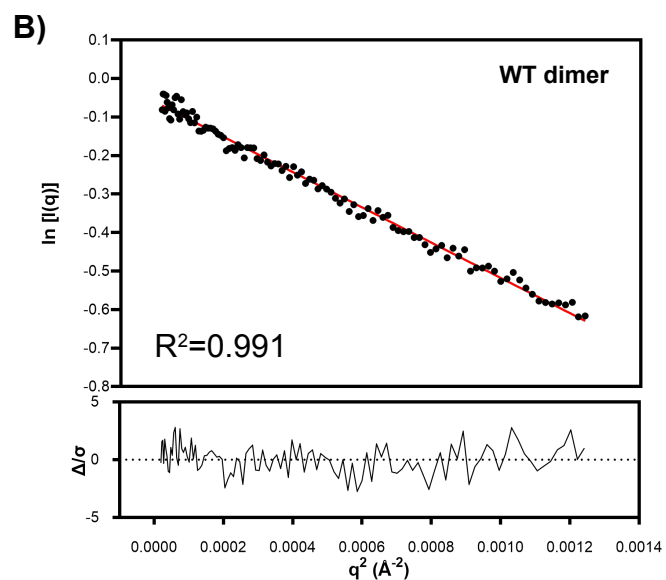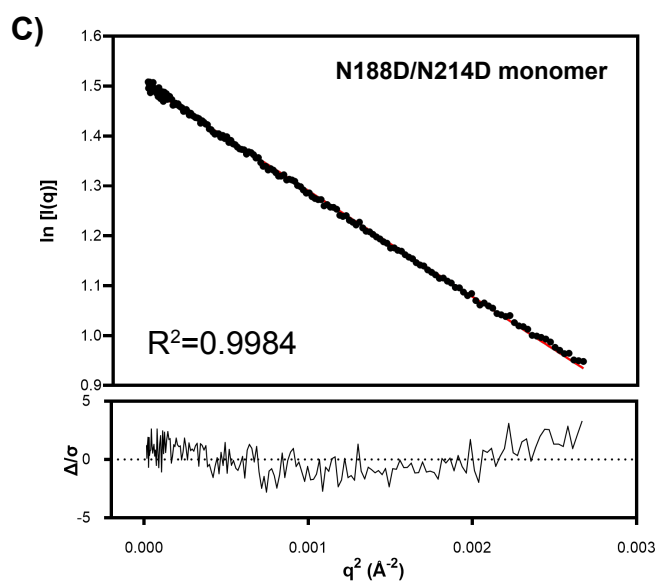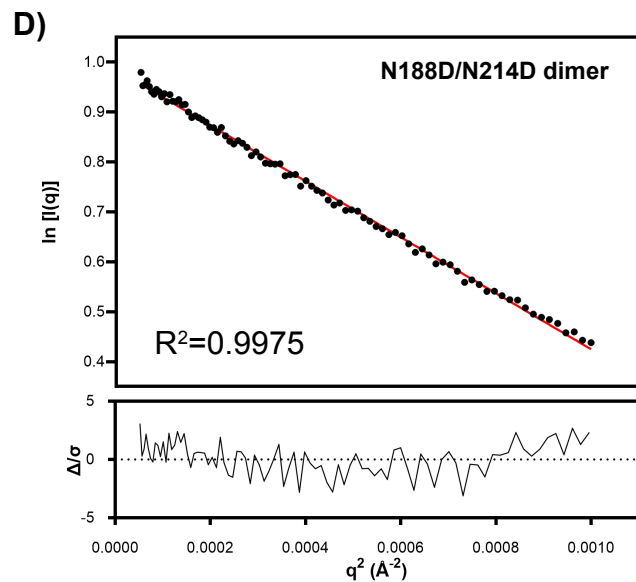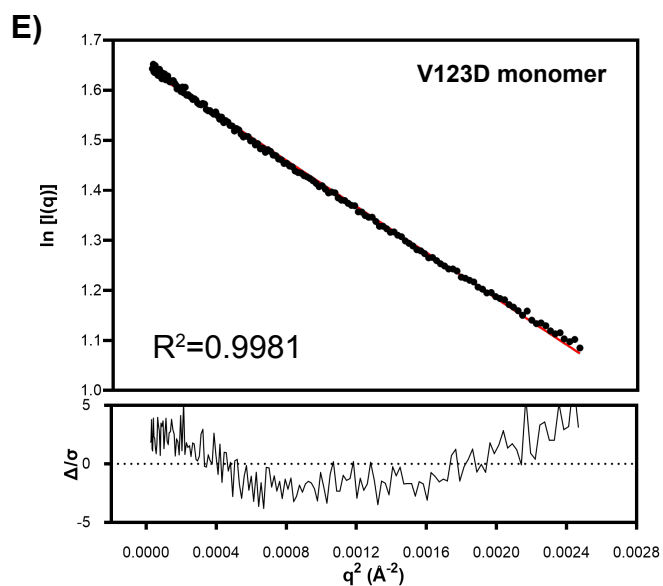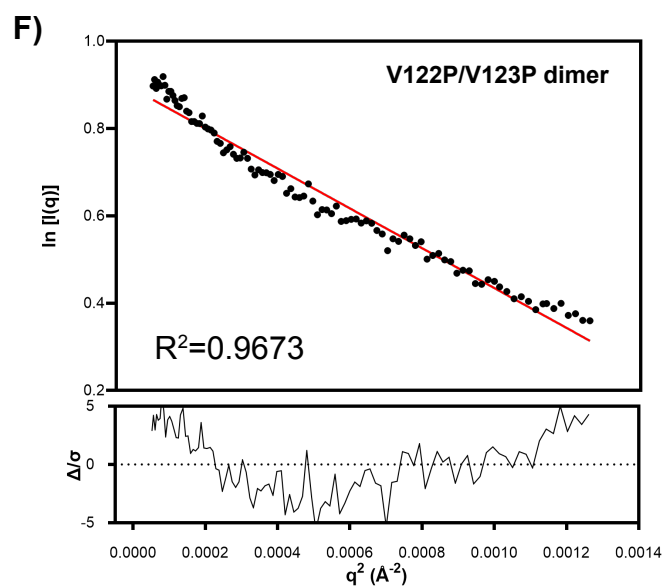

# Supplemental Figure 5

Ladder  
GRB2 knockdown  
GRB2 WT addback  
GRB2 V123D addback  
GRB2 V123N addback  
GRB2 V122P/V123P addback

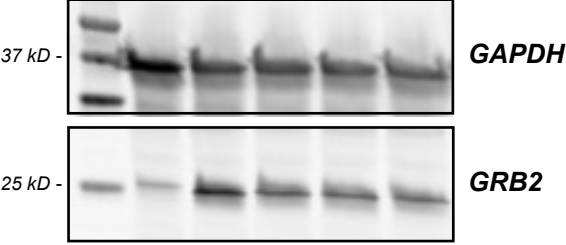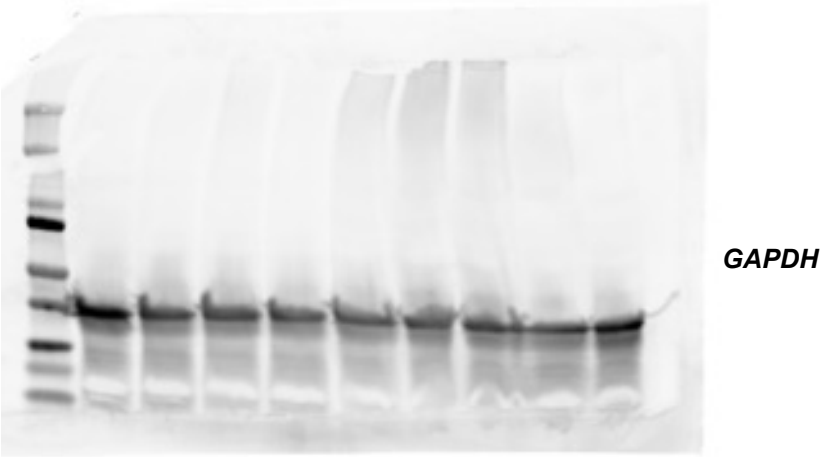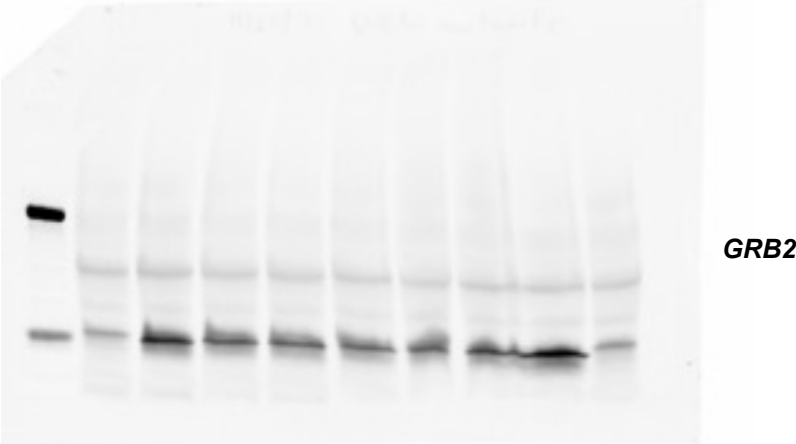

# Supplemental Figure 6

Time (min) 0 2 5 15 0 2 5 15 0 2 5 15 0 2 5 15

LAT pY226

GAPDH

WT KD V123D monomer V122P/V123P dimer

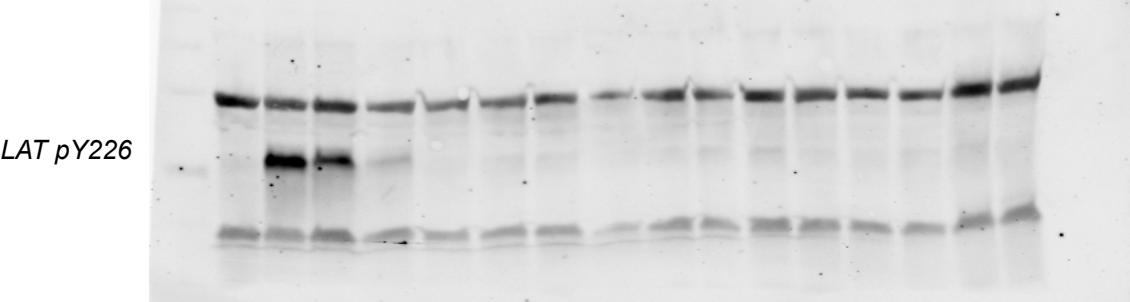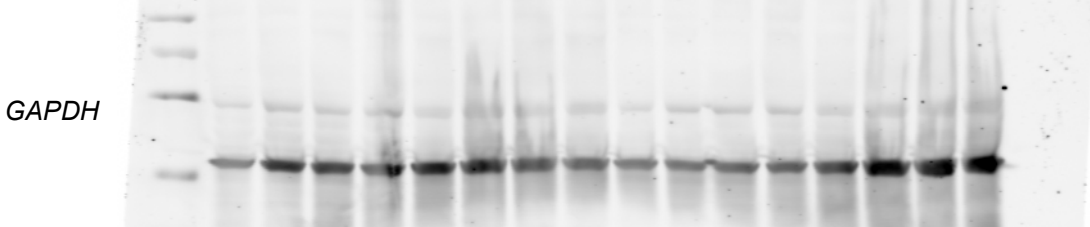

# Supplemental Table 1

| <b>PDB ID</b> | <b>Resolution (Å)</b> | <b>Number of entities</b> | <b>Molecular weight (kD)</b> | <b>Domain(s) represented</b> | <b>Residues represented</b> | <b>Ligand</b> | <b>Reference (PMID)</b> |
|---------------|-----------------------|---------------------------|------------------------------|------------------------------|-----------------------------|---------------|-------------------------|
| 1BM2          | 2.1                   | 2                         | 14.42                        | SH2                          | 49-163                      | Yes           | 10090780                |
| 1BMB          | 1.8                   | 2                         | 15.57                        | SH2                          | 49-168                      | Yes           | 10090780                |
| 1CJ1          | 3                     | 1                         | 142.16                       | SH2                          | 57-152                      | Yes           | 10395476                |
| 1FYR*         | 2.4                   | 2                         | 55.52                        | SH2                          | 50-161                      | Yes           | 11063574                |
| 1GRI*         | 3.1                   | 1                         | 50.48                        | SH2                          | 1-217                       | No            | 7716522                 |
| 1JYQ          | 2                     | 2                         | 23.67                        | SH2                          | 60-151                      | Yes           | 11827484                |
| 1JYR          | 1.55                  | 2                         | 12.13                        | SH2                          | 60-151                      | Yes           | 11827484                |
| 1JYU          | 2.75                  | 1                         | 11.07                        | SH2                          | 60-151                      | No            | 11827484                |
| 1TZE          | 2.1                   | 2                         | 12.39                        | SH2                          | 55-152                      | Yes           | 8673601                 |
| 1ZFP          | 1.8                   | 2                         | 12.37                        | SH2                          | 56-153                      | Yes           | 9642078                 |
| 2AOA          | 1.99                  | 1                         | 25.74                        | SH2                          | 55-153                      | Yes           | 16165154                |
| 2AOB          | 1.8                   | 1                         | 55.36                        | SH2                          | 55-153                      | Yes           | 16165154                |
| 2H46*         | 1.9                   | 1                         | 13.78                        | SH2                          | 53-162                      | No            | 17466257                |
| 2H5K          | 3.25                  | 2                         | 28.01                        | SH2                          | 53-162                      | Yes           | 17466257                |
| 2HUW          | 1.9                   | 1                         | 28.52                        | SH2                          | 53-162                      | Yes           | 17001728                |
| 3C7I          | 1.7                   | 1                         | 14.26                        | SH2                          | 53-162                      | Yes           | 17001728                |
| 3IMD          | 2                     | 1                         | 28.8                         | SH2                          | 53-163                      | Yes           | 19886660                |
| 3IMJ          | 2.02                  | 1                         | 28.6                         | SH2                          | 53-163                      | Yes           | 19886660                |
| 3IN7          | 2                     | 1                         | 28.63                        | SH2                          | 53-163                      | Yes           | 19886660                |
| 3IN8          | 1.7                   | 1                         | 14.35                        | SH2                          | 53-163                      | Yes           | 19886660                |
| 3KFJ          | 2.02                  | 1                         | 14.41                        | SH2                          | 53-163                      | Yes           | 19886660                |
| 3MXC          | 2                     | 2                         | 12.89                        | SH2                          | 55-152                      | Yes           | 22001015                |
| 3MXY          | 2.3                   | 2                         | 12.86                        | SH2                          | 55-152                      | Yes           | 22001015                |
| 3N7Y          | 2.02                  | 2                         | 36.44                        | SH2                          | 55-152                      | Yes           | 21116482                |
| 3N84          | 2                     | 2                         | 83.89                        | SH2                          | 53-163                      | Yes           | 21116482                |
| 3N8M          | 2                     | 2                         | 14.63                        | SH2                          | 53-163                      | Yes           | 21116482                |
| 3OV1          | 1.6                   | 2                         | 14.51                        | SH2                          | 53-163                      | Yes           | 22007755                |
| 3OVE          | 1.82                  | 2                         | 14.2                         | SH2                          | 53-163                      | Yes           | 22007755                |
| 3S8L          | 1.71                  | 2                         | 14.38                        | SH2                          | 53-163                      | Yes           | 22007755                |
| 3S8N          | 1.71                  | 2                         | 14.62                        | SH2                          | 53-163                      | Yes           | 22007755                |
| 3S8O          | 1.85                  | 2                         | 14.34                        | SH2                          | 53-163                      | Yes           | 22007755                |
| 3WA4          | 1.35                  | 2                         | 12.58                        | SH2                          | 60-152                      | Yes           | 24098653                |
| 4P9V          | 1.64                  | 2                         | 14.45                        | SH2                          | 53-163                      | Yes           | 24856058                |
| 4P9Z          | 1.8                   | 2                         | 14.69                        | SH2                          | 53-163                      | Yes           | 24856058                |
| 5CDW          | 2.602                 | 2                         | 197.82                       | SH2                          | 54-153                      | Yes           | 26645482                |
| 6ICG          | 1.15                  | 1                         | 22.57                        | SH2                          | 60-152                      | No            | 30923665                |
| 6ICH*         | 2                     | 1                         | 11                           | SH2                          | 60-152                      | No            | 30923665                |
| 6WM1          | 1.8                   | 2                         | 29.06                        | SH2                          | 53-163                      | Yes           | 32916312                |
| 6WO2          | 2                     | 2                         | 28.92                        | SH2                          | 53-163                      | Yes           | 32916312                |
| 1GCQ          | 1.68                  | 2                         | 22.15                        | C-SH3                        | 159-217                     | Yes           | 11406576                |
| 2VVK          | 1.6                   | 1                         | 6.46                         | C-SH3                        | 161-214                     | No            | 19523899                |
| 2VWF          | 1.58                  | 2                         | 8.39                         | C-SH3                        | 159-214                     | No            | 19523899                |
| 2W0Z          | 1.7                   | 2                         | 7.57                         | C-SH3                        | 159-214                     | No            | 19523899                |
| 6SDF          | 2.5                   | 1                         | 14.7                         | N-SH3                        | 2-59                        | No            | 32510467                |

\*Domain-swapped dimer



## Supplemental Table 2

| <b>A) Sample details</b>                                                          |                                                                                                                                                                                                                                                                                                                                                                                                                                                                                               |
|-----------------------------------------------------------------------------------|-----------------------------------------------------------------------------------------------------------------------------------------------------------------------------------------------------------------------------------------------------------------------------------------------------------------------------------------------------------------------------------------------------------------------------------------------------------------------------------------------|
| SEC Column                                                                        | Superdex 75 increase 10/300                                                                                                                                                                                                                                                                                                                                                                                                                                                                   |
| Loaded concentration (mg/ml)                                                      | 8.28 (WT monomer), 4.46 (WT dimer), 8.37 (N188D/N214D monomer), 2.84 (N188D/N214D dimer), 8.68 (V123D monomer), 4.00 (V122P/V123P dimer)                                                                                                                                                                                                                                                                                                                                                      |
| Injection volume (ul)                                                             | 250                                                                                                                                                                                                                                                                                                                                                                                                                                                                                           |
| Flow rate (ml/min)                                                                | 0.5                                                                                                                                                                                                                                                                                                                                                                                                                                                                                           |
| Solvent (solvent blanks taken from SEC flow-through prior to elution of protein)  | 20 mM Tris pH 8.0. 150 mM NaCl, 1 mM DTT                                                                                                                                                                                                                                                                                                                                                                                                                                                      |
| <b>B) SAXS data collection parameters</b>                                         |                                                                                                                                                                                                                                                                                                                                                                                                                                                                                               |
| Instrument                                                                        | BioCAT facility at the Advanced Photon Source beamline 18ID with Pilatus3 1M (Dectris) detector                                                                                                                                                                                                                                                                                                                                                                                               |
| Wavelength (Å)                                                                    | 1.033                                                                                                                                                                                                                                                                                                                                                                                                                                                                                         |
| Beam size (um <sup>2</sup> )                                                      | 150 (h) x 80 (v)                                                                                                                                                                                                                                                                                                                                                                                                                                                                              |
| Camera length (m)                                                                 | 3.5                                                                                                                                                                                                                                                                                                                                                                                                                                                                                           |
| $q$ measurement range (Å <sup>-1</sup> )                                          | 0.0045-0.35                                                                                                                                                                                                                                                                                                                                                                                                                                                                                   |
| Absolute scaling method                                                           | N/A                                                                                                                                                                                                                                                                                                                                                                                                                                                                                           |
| Basis for normalization to constant counts                                        | To incident intensity, by ion chamber counter                                                                                                                                                                                                                                                                                                                                                                                                                                                 |
| Monitoring for radiation damage                                                   | Frame-by-frame comparison of data                                                                                                                                                                                                                                                                                                                                                                                                                                                             |
| Exposure time                                                                     | 0.5 sec exposure time with 1 sec total exposure period of entire SEC elution                                                                                                                                                                                                                                                                                                                                                                                                                  |
| Sample configuration                                                              | SEC-MALS-DLS-RI-SAXS. Size separation used a Superdex 75 increase 10/300 GL column and an Infinity II HPLC (Agilent Technologies). Flow was in line with the UV-MALS-DLS-RI instruments and SAXS after the column. UV data was measured in the Agilent, and MALS-DLS-RI data by DAWN HELEOS-II (17 MALS + 1 DLS channels) and Optilab T-rEX (RI) instruments (Wyatt). SAXS data was measured with sheath-flow cell in a 1.5 mm ID 1.52 mm OD quartz capillary, effective path length 0.49 mm. |
| Sample temperature (°C)                                                           | 22                                                                                                                                                                                                                                                                                                                                                                                                                                                                                            |
| <b>C) Software employed for SAXS data reduction, analysis, and interpretation</b> |                                                                                                                                                                                                                                                                                                                                                                                                                                                                                               |
| SAXS data reduction                                                               | Radial averaging, background subtraction, frame comparison, averaging, and subtraction were made using BioXTAS RAW 2.0.2.                                                                                                                                                                                                                                                                                                                                                                     |
| Basic analysis: Guinier, MW, Normalized Kratky, P(r)                              | Guinier plot and molecular weights were calculated using BioXTAS RAW 2.1.1, P(r) function using GNOM from ATSAS 3.0.                                                                                                                                                                                                                                                                                                                                                                          |
| MALS-DLS-RI analysis                                                              | Astra 7.1.3 (Wyatt)                                                                                                                                                                                                                                                                                                                                                                                                                                                                           |
